# Supplementary material
Source: Elsevier journal article supplement (https://www.sciencedirect.com/science/article/pii/S0021755719304656)
Supplement: mmc1 [file S0021755719304656:mmc1.docx]

JPED_2019-390 - **Supplementary material**

**Table 1 - Effect of the variables ‘prednisolone,’ ‘age group,’ and ‘developmental regression’ and their interactions on the ADL scale global language score and the main scores of the ABFW instrument by multivariate analysis, repeated measures (n = 38).**

|  | **F** | **p** | **Effect size** | **PNC2** | **Observed power** |
| --- | --- | --- | --- | --- | --- |
|  | **Global language score — ADL** | | | | |
| Time | 17.284 | **0.000** | 0.649 | 51.852 | 1.000 |
| Prednisolone | 0.178 | 0.910 | 0.019 | 0.535 | 0.079 |
| Regression | 0.713 | 0.552 | 0.071 | 2.140 | 0.182 |
| Age range | 0.191 | 0.901 | 0.020 | 0.574 | 0.081 |
| Prednisolone*Regression | 1.191 | 0.331 | 0.113 | 3.573 | 0.284 |
| Prednisolone*Age range | 0.835 | 0.486 | 0.082 | 2.504 | 0.207 |
| Prednisolone*Regression*Range etária | 2.824 | **0.057** | 0.232 | 8.473 | 0.615 |
|  | **Total of communicative acts — ABFW** | | | | |
| Time | 14.955 | **0.000** | 0.624 | 44.866 | 1.000 |
| Prednisolone | 0.979 | 0.417 | 0.098 | 2.938 | 0.237 |
| Regression | 1.025 | 0.397 | 0.102 | 3.076 | 0.247 |
| Age range | 2.168 | 0.115 | 0.194 | 6.503 | 0.490 |
| Prednisolone*Regression | 2.888 | **0.054** | 0.243 | 8.663 | 0.623 |
| Prednisolone*Age range | 1.335 | 0.284 | 0.129 | 4.004 | 0314 |
| Prednisolone*Regression*Range etária | 1.683 | 0.194 | 0.158 | 5.048 | 0.390 |
|  | **Total of verbal acts — ABFW** | | | | |
| Time | 2.909 | **0.052** | 0.238 | 8.727 | 0.629 |
| Prednisolone | 1.144 | 0.349 | 0.109 | 3.431 | 0.274 |
| Regression | 1.684 | 0.193 | 0.153 | 5.052 | 0.392 |
| Age range | 0.455 | 0.716 | 0.046 | 1.365 | 0.130 |
| Prednisolone*Regression | 0.870 | 0.468 | 0.085 | 2.610 | 0.215 |
| Prednisolone*Age range | 0.260 | 0.854 | 0.027 | 0.779 | 0.093 |
| Prednisolone*Regression*Range etária | 1.438 | 0.253 | 0.134 | 4.314 | 0.338 |
|  | **Total of vocal acts — ABFW** | | | | |
| Time | 4.532 | **0.010** | 0.327 | 13.596 | 0.834 |
| Prednisolone | 5.338 | **0.005** | 0.364 | 16.014 | 0.894 |
| Regression | 4.773 | **0.008** | 0.338 | 14.320 | 0.854 |
| Age range | 3.505 | **0.028** | 0.273 | 10.514 | 0.719 |
| Prednisolone*Regression | 3.301 | **0.035** | 0.261 | 9.904 | 0.690 |
| Prednisolone*Age range | 5.683 | **0.004** | 0.378 | 17.048 | 0.913 |
| Prednisolone*Regression*Range etária | 4.922 | **0.007** | 0.345 | 14.766 | 0.866 |
|  | **Total of gesture acts — ABFW** | | | | |
| Time | 26.836 | **0.000** | 0.742 | 80.508 | 1.000 |
| Prednisolone | 0.240 | 0.868 | 0.025 | 0.720 | 0.090 |
| Regression | 0.495 | 0.688 | 0.050 | 1.486 | 0.138 |
| Age range | 2.439 | **0.085** | 0.207 | 7.318 | 0.545 |
| Prednisolone*Regression | 1.380 | 0.269 | 0.129 | 4.140 | 0.326 |
| Prednisolone*Age range | 1.928 | 0.148 | 0.171 | 5.785 | 0.444 |
| Prednisolone*Regression*Range etária | 1.330 | 0.285 | 0125 | 3.989 | 0.315 |

ADL, Language Development Assessment; ABFW, Child Language Test in Phonology, Vocabulary, Fluency, and Pragmatics.

**Table 2 - Effect of the variables ‘prednisolone,’ ‘age range,’ and ‘developmental regression’ and their interactions on several communicative functions of the ABFW instrument by multivariate analysis, with repeated measures (n = 38).**

|  | **F** | **p** | **Effect size** | **PNC2** | **Observed power** |
| --- | --- | --- | --- | --- | --- |
|  | **Total of “exclamative” function acts** | | | | |
| Time | 14.344 | 0.000 | 0.606 | 43.032 | 1.000 |
| Prednisolone | 0.825 | 0.491 | 0.081 | 2.474 | 0.205 |
| Regression | 0.290 | 0.832 | 0.030 | 0.871 | 0.099 |
| Age range | 0.518 | 0.674 | 0.053 | 1.553 | 0.142 |
| Prednisolone*Regression | 2.784 | **0.059** | 0.230 | 8.351 | 0.608 |
| Prednisolone*Age range | 0.223 | 0.879 | 0.023 | 0.670 | 0.087 |
| Prednisolone*Regression*Range etária | 1.561 | 0.221 | 0.143 | 4.682 | 0.365 |
|  | **Total acts of the “naming” function** | | | | |
| Time | 2.147 | 0.117 | 0.187 | 6.442 | 0.488 |
| Prednisolone | 1.782 | 0.173 | 0.160 | 5.346 | 0.413 |
| Regression | 2.919 | **0.051** | 0.238 | 8.757 | 0.630 |
| Age range | 2.583 | **0.073** | 0.217 | 7.749 | 0.572 |
| Prednisolone*Regression | 1.185 | 0.333 | 0.113 | 3.554 | 0.283 |
| Prednisolone*Age range | 1.249 | 0.311 | 0.118 | 3.747 | 0.297 |
| Prednisolone*Regression*Range etária | 2.380 | **0.091** | 0.203 | 7.141 | 0.534 |
|  | **Total acts of the “shared play” function** | | | | |
| Time | 14.298 | **0.000** | 0.605 | 42.895 | 1.000 |
| Prednisolone | 0.363 | .0780 | 0.037 | 1.089 | 0.112 |
| Regression | 0.551 | 0.652 | 0.056 | 1.653 | 0.149 |
| Age range | 7.490 | **0.001** | 0.445 | 22.471 | 0.972 |
| Prednisolone*Regression | 0.868 | 0.469 | 0.085 | 2.605 | 0.214 |
| Prednisolone*Age range | 4.358 | **0.012** | 0318 | 13.073 | 0.818 |
| Prednisolone*Regression*Range etária | 0.232 | 0.873 | 0.024 | 0.695 | 0.088 |
|  | **Total acts of the “recognizing the other” function** | | | | |
| Time | 6.513 | 0.002 | 0.411 | 19.540 | 0.947 |
| Prednisolone | 0.338 | 0.798 | 0.035 | 1.015 | 0.108 |
| Regression | 0.357 | 0.784 | 0.037 | 1.072 | 0.111 |
| Age range | 0.481 | 0.698 | 0.049 | 1.442 | 0.135 |
| Prednisolone*Regression | 1.232 | 0.317 | 0.117 | 3.696 | 0.293 |
| Prednisolone*Age range | 2.531 | **0.077** | 0.213 | 7.592 | 0.562 |
| Prednisolone*Regression*Range etária | 1.401 | 0.263 | 0.130 | 4.202 | 0.330 |
|  | **Mean of communicative acts of more interpersonal functions** | | | | |
| Time | 2.857 | **0.055** | 0.234 | 8.570 | 0.620 |
| Prednisolone | 1.432 | 0.254 | 0.133 | 4.295 | 0.337 |
| Regression | 0.925 | 0.442 | 0.090 | 2.774 | 0.226 |
| Age range | 0.896 | 0.455 | 0.088 | 2.688 | 0.220 |
| Prednisolone*Regression | 0.347 | 0.792 | 0.036 | 1.040 | 0.109 |
| Prednisolone*Age range | 2.756 | **0.061** | 0.228 | 8.267 | 0.603 |
| Prednisolone*Regression*Range etária | 2.465 | **0.083** | 0.209 | 7.396 | 0.550 |
|  | **Mean of communicative acts of less interpersonal functions** | | | | |
| Time | 3.371 | **0.032** | 0.265 | 10.114 | 0.700 |
| Prednisolone | .914 | 0.447 | 0.089 | 2.741 | 0.224 |
| Regression | 1.525 | 0.230 | 0.140 | 4.575 | 0.357 |
| Age range | 0.368 | 0.777 | 0.038 | 1.105 | 0.113 |
| Prednisolone*Regression | 0.222 | 0.881 | 0.023 | 0.665 | 0.087 |
| Prednisolone*Age range | 3.841 | **0.020** | 0.292 | 11.522 | 0.762 |
| Prednisolone*Regression*Range etária | 2.342 | **0.095** | 0.201 | 7.026 | 0.527 |

ABFW, Child Language Test in Phonology, Vocabulary, Fluency, and Pragmatics.
